# Supplementary material for: Retinol and α-tocopherol in human milk and their relationship with dietary intake during lactation
Source: Royal Society of Chemistry journal article supplement (doi:10.1039/c5fo01293g), 2016-01-01
Supplement: c5fo01293g2.pdf [file c5fo01293g2.pdf]

Supplemental Table 1. Relationship between retinol and  $\alpha$ -tocopherol in three lactation stages from three regions in China.

| Spearman<br>Test | Colostrum |         | Transitional milk |         | Mature milk |         |
|------------------|-----------|---------|-------------------|---------|-------------|---------|
|                  | r         | p       | r                 | p       | r           | p       |
| Hangzhou         | 0.74      | < 0.001 | 0.65              | < 0.001 | 0.67        | < 0.001 |
| Lanzhou          | 0.77      | < 0.001 | 0.57              | < 0.001 | 0.49        | 0.004   |
| Beijing          | 0.47      | 0.006   | 0.84              | < 0.001 | 0.71        | < 0.001 |
| Total            | 0.37      | 0.002   | 0.41              | < 0.001 | 0.53        | < 0.001 |
